# Supplementary material for: Current patterns of trauma center proliferation have not led to proportionate improvements in access to care or mortality after injury: An ecologic study
Source: PubMed Central journal article supplement — J Trauma Acute Care Surg. 2023 Mar 7;94(6):755–64. doi: 10.1097/TA.0000000000003940 (PMC10208642; doi:10.1097/ta.0000000000003940), 2023-03-07
Supplement: jt-94-755-s002.pdf [file jt-94-755-s002.pdf]

# Supplemental Digital Content

## A1: HLTC Growth by Year & Level

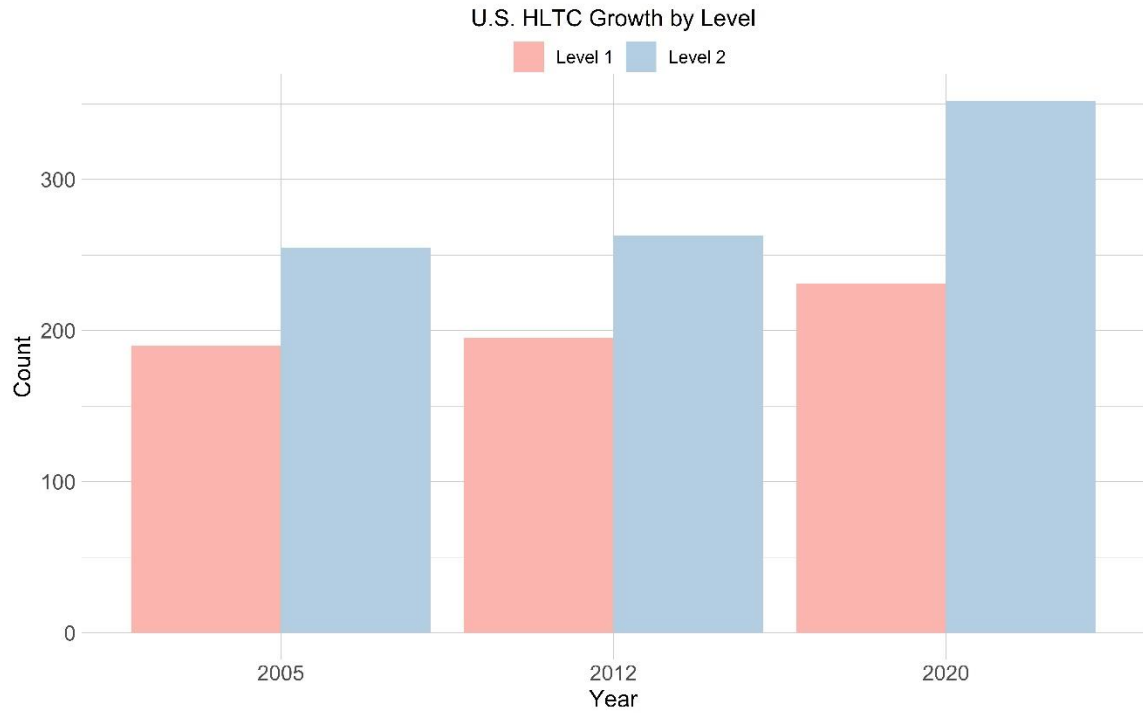

Data: American Trauma Society, Penn Injury Science Center

*Figure A1: Number of high level trauma center (HLTC) designated hospitals in the United States by year. Level 1 designated hospitals are in red, Level 2 in blue. Data were obtained from the American Trauma Society and the Penn Injury Science Center.*

## A2-A7: GWR Local Model IRR, P-value, and Covariate Distributions

Shown in Appendices 2-7 are maps of local GWR IRR and P-value for each variable in the presented models (HLTC access and per-capita injury mortality). Subplot A shows the geographic distribution of the IRR in the access model, C shows the injury model. Lighter green colors show a positive association (faster HLTC access, or higher injury), while darker red shows a negative association (slower HLTC access, or lower injury). Subplots B and D show the local p-values for the associations in plots A and B, respectively, with deeper purple indicating lower p-value for significance. Subplot E shows the distribution of the covariate at the county level.

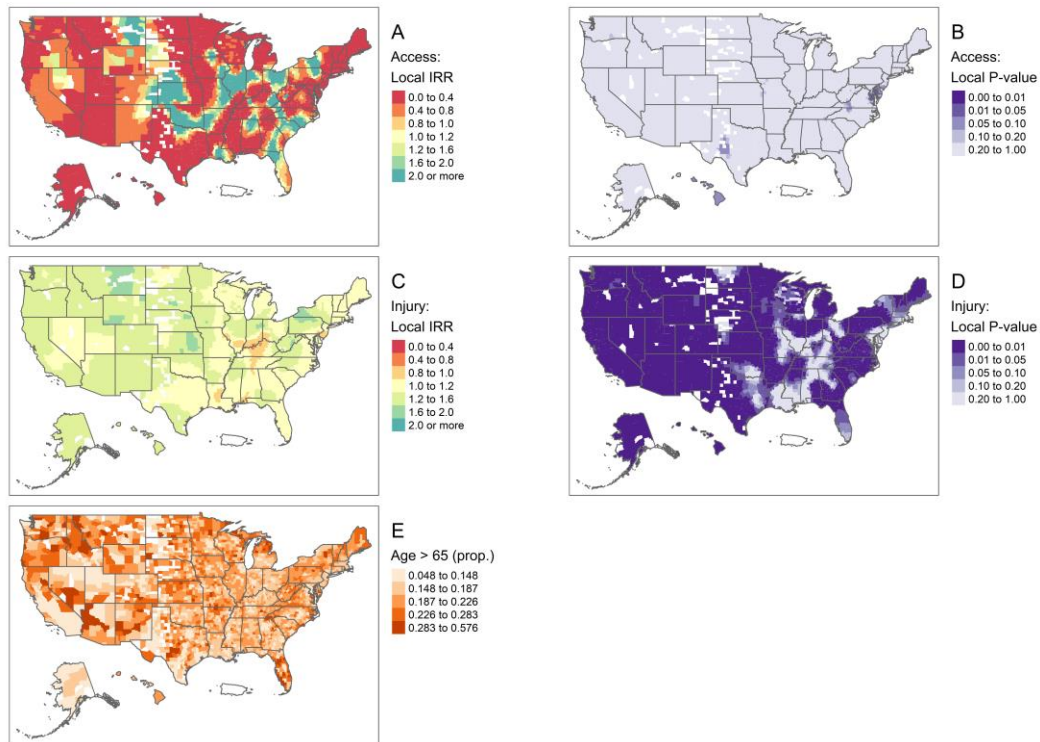

Figure A2: Age  $\geq$  65 (%)

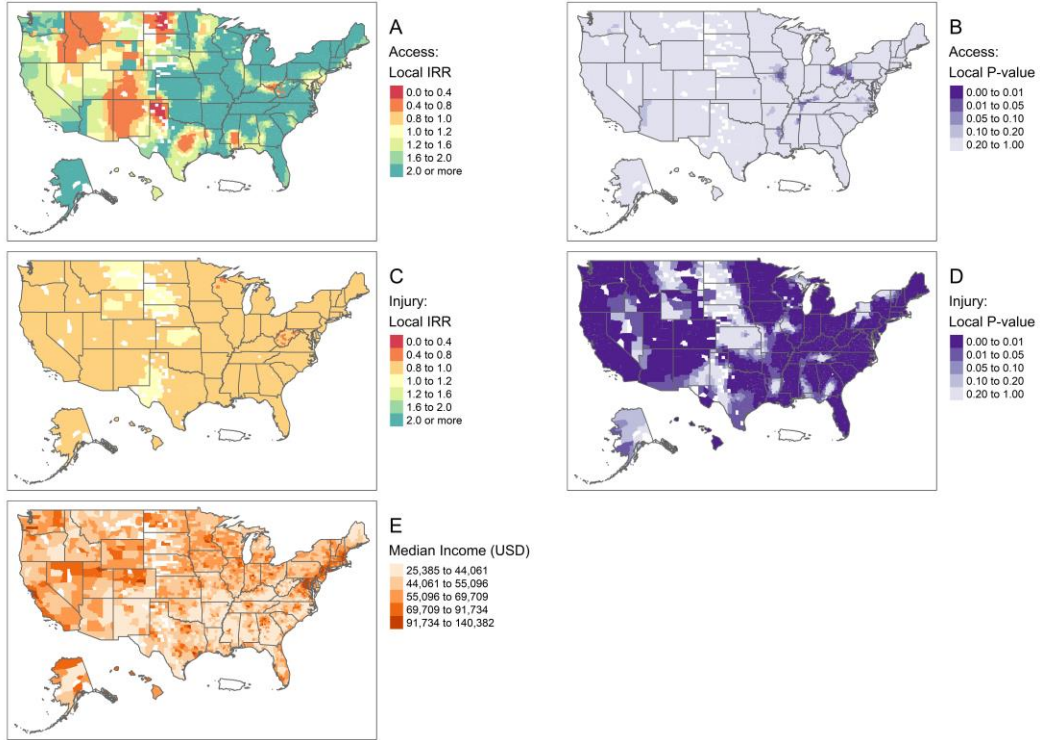

Figure A3: Median Income (USD)

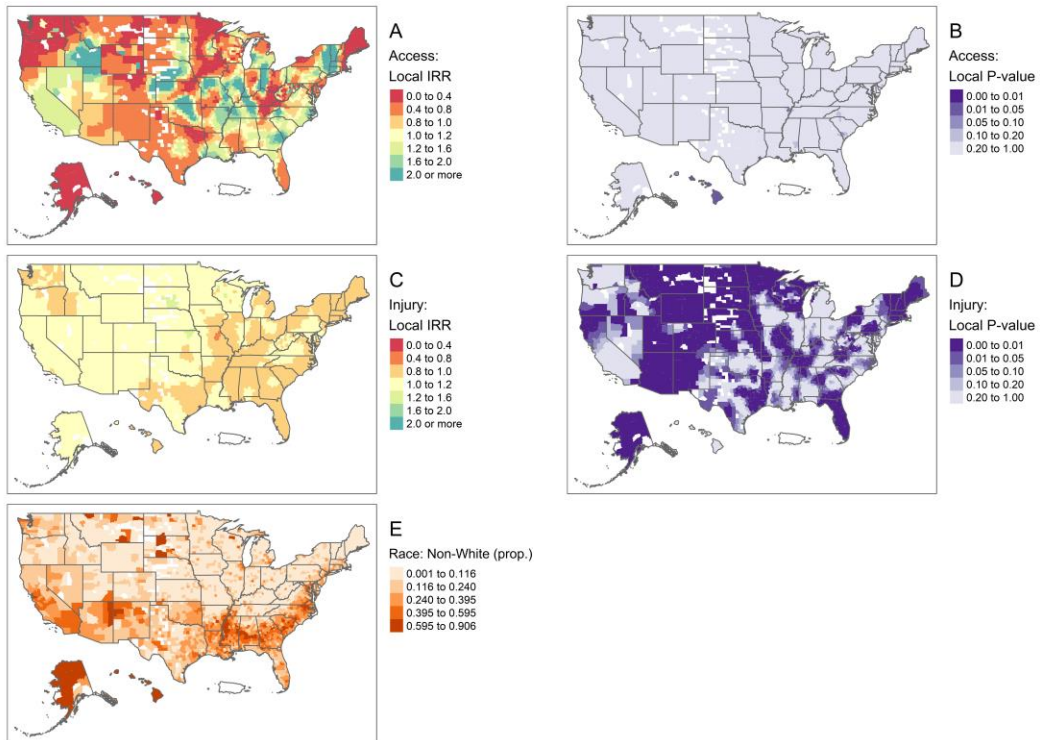

Figure A4: Non-White Population (%)

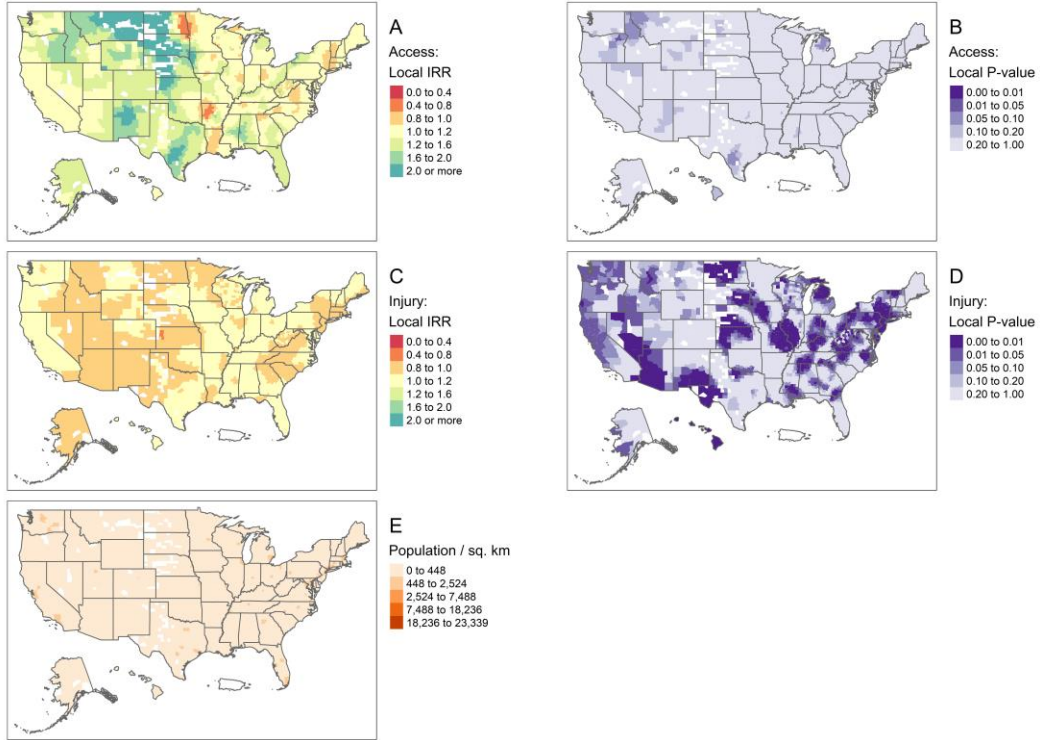

Figure A5: Population Density ( $\frac{\text{persons}}{\text{km}^2}$ )

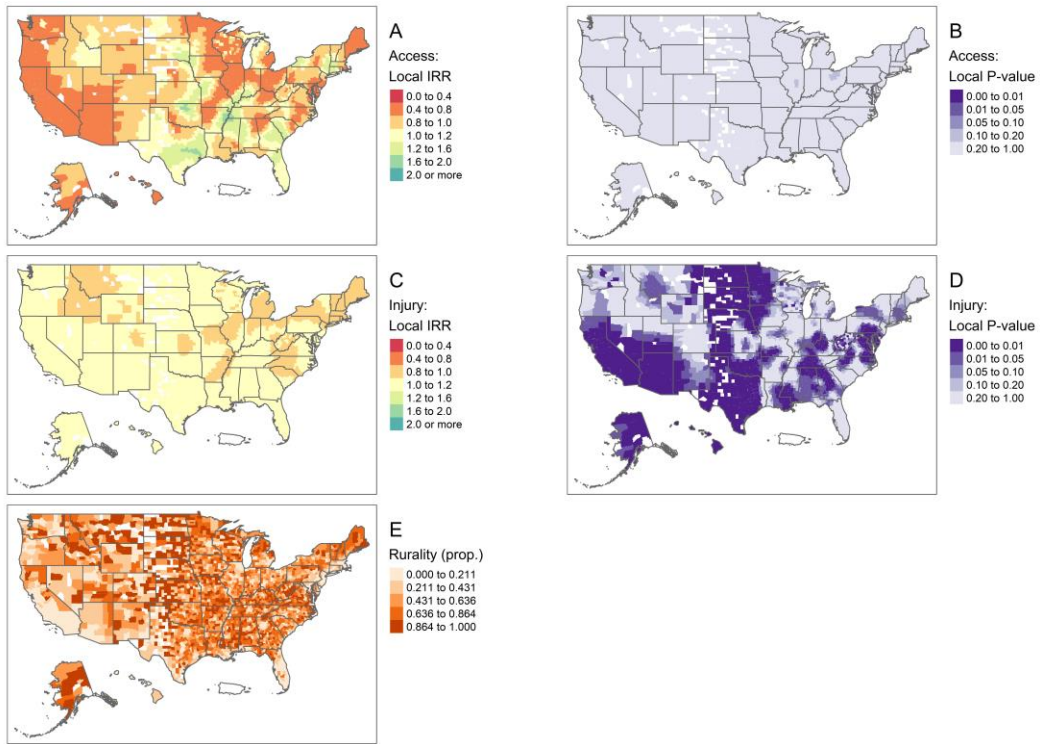

Figure A6: Rural Population (%)

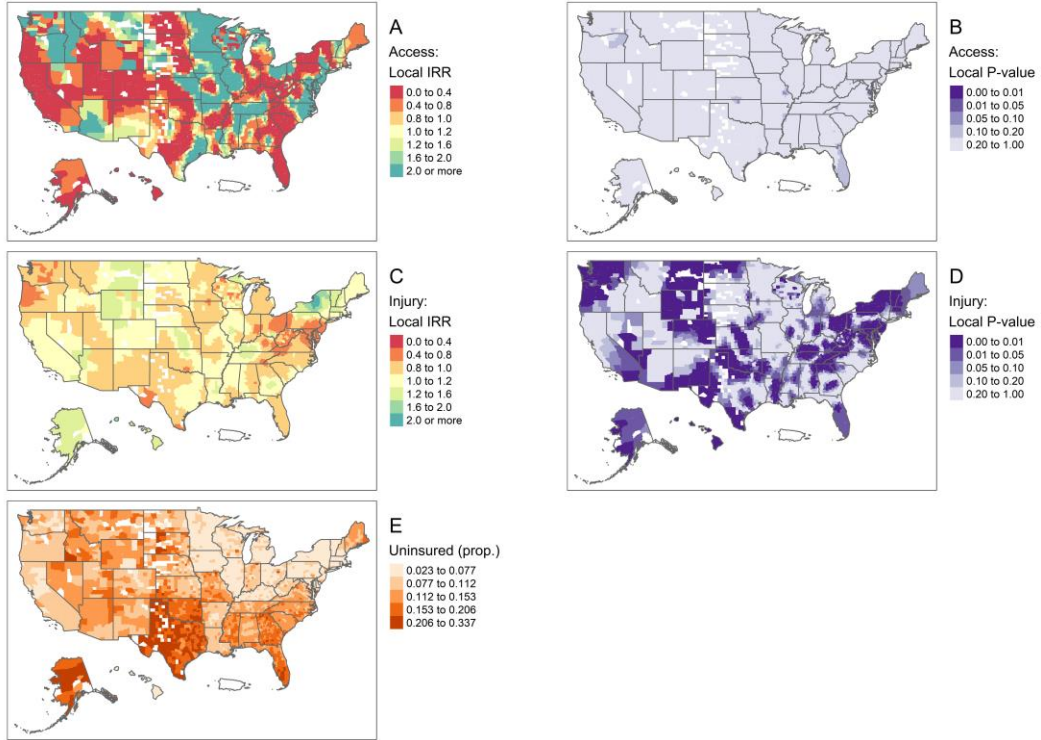

Figure A7: Uninsured Population (%)
